# Supplementary material for: Nanoscale resolution of microbial fiber degradation in action
Source: eLife journal article supplement (doi:10.7554/elife.76523), 2022-05-31
Supplement: supp [file elife_poa_e76523_Figure_1_figure_supplement_1.docx]

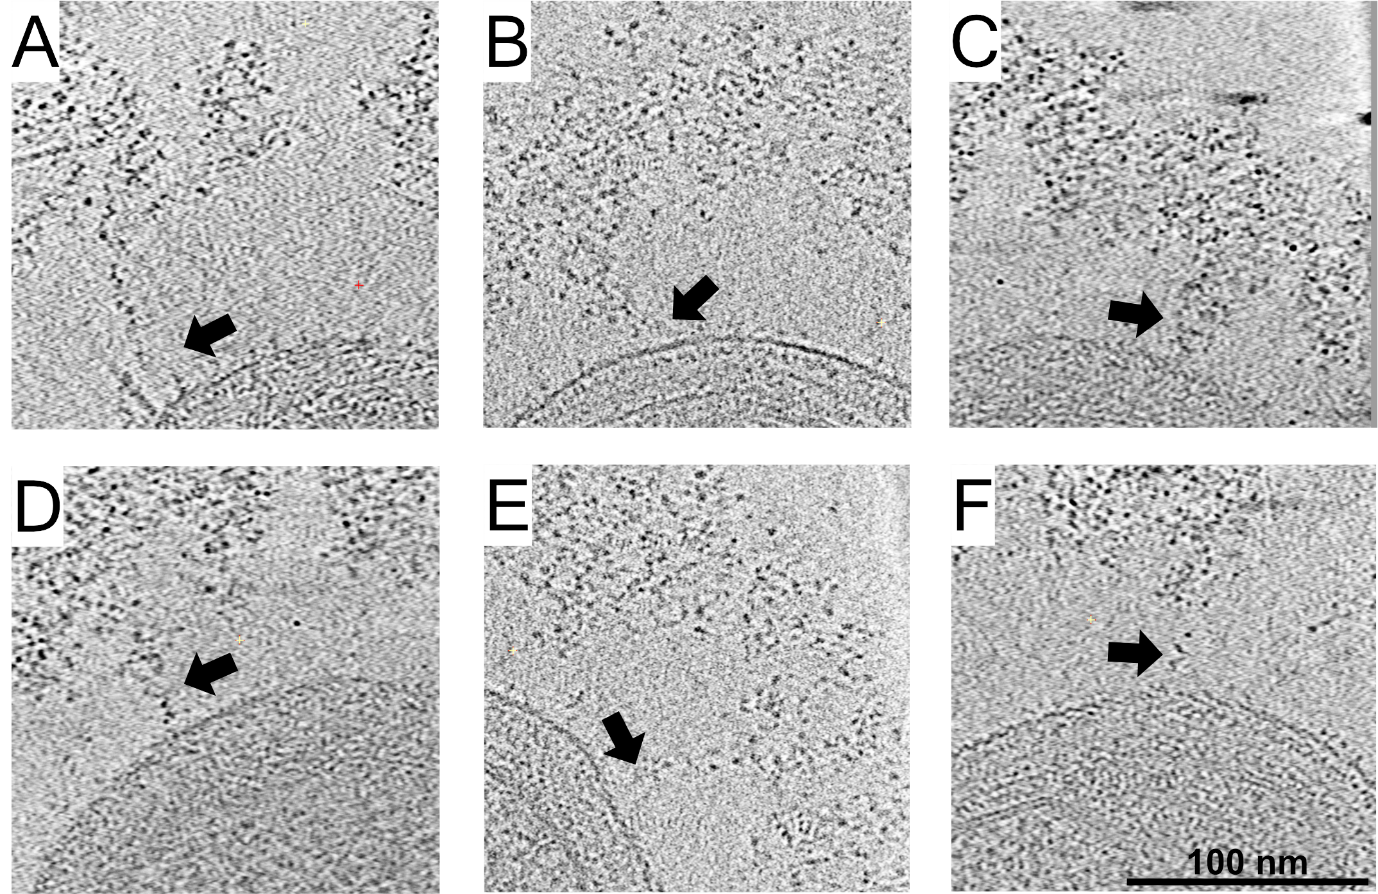


**Figure 1-figure supplement 1. Cellulosomes emanate from the cell wall towards the densely packed cellulosome layer.** A density span between the bacterium and the cellulosome layer (arrows) was detected.x-y slices through six bacteria, representing 5.4 nm in thickness.
