# Supplementary material for: Nanoscale resolution of microbial fiber degradation in action
Source: eLife journal article supplement (doi:10.7554/elife.76523), 2022-05-31
Supplement: supp [file elife_poa_e76523_Figure_1_figure_supplement_2.docx]

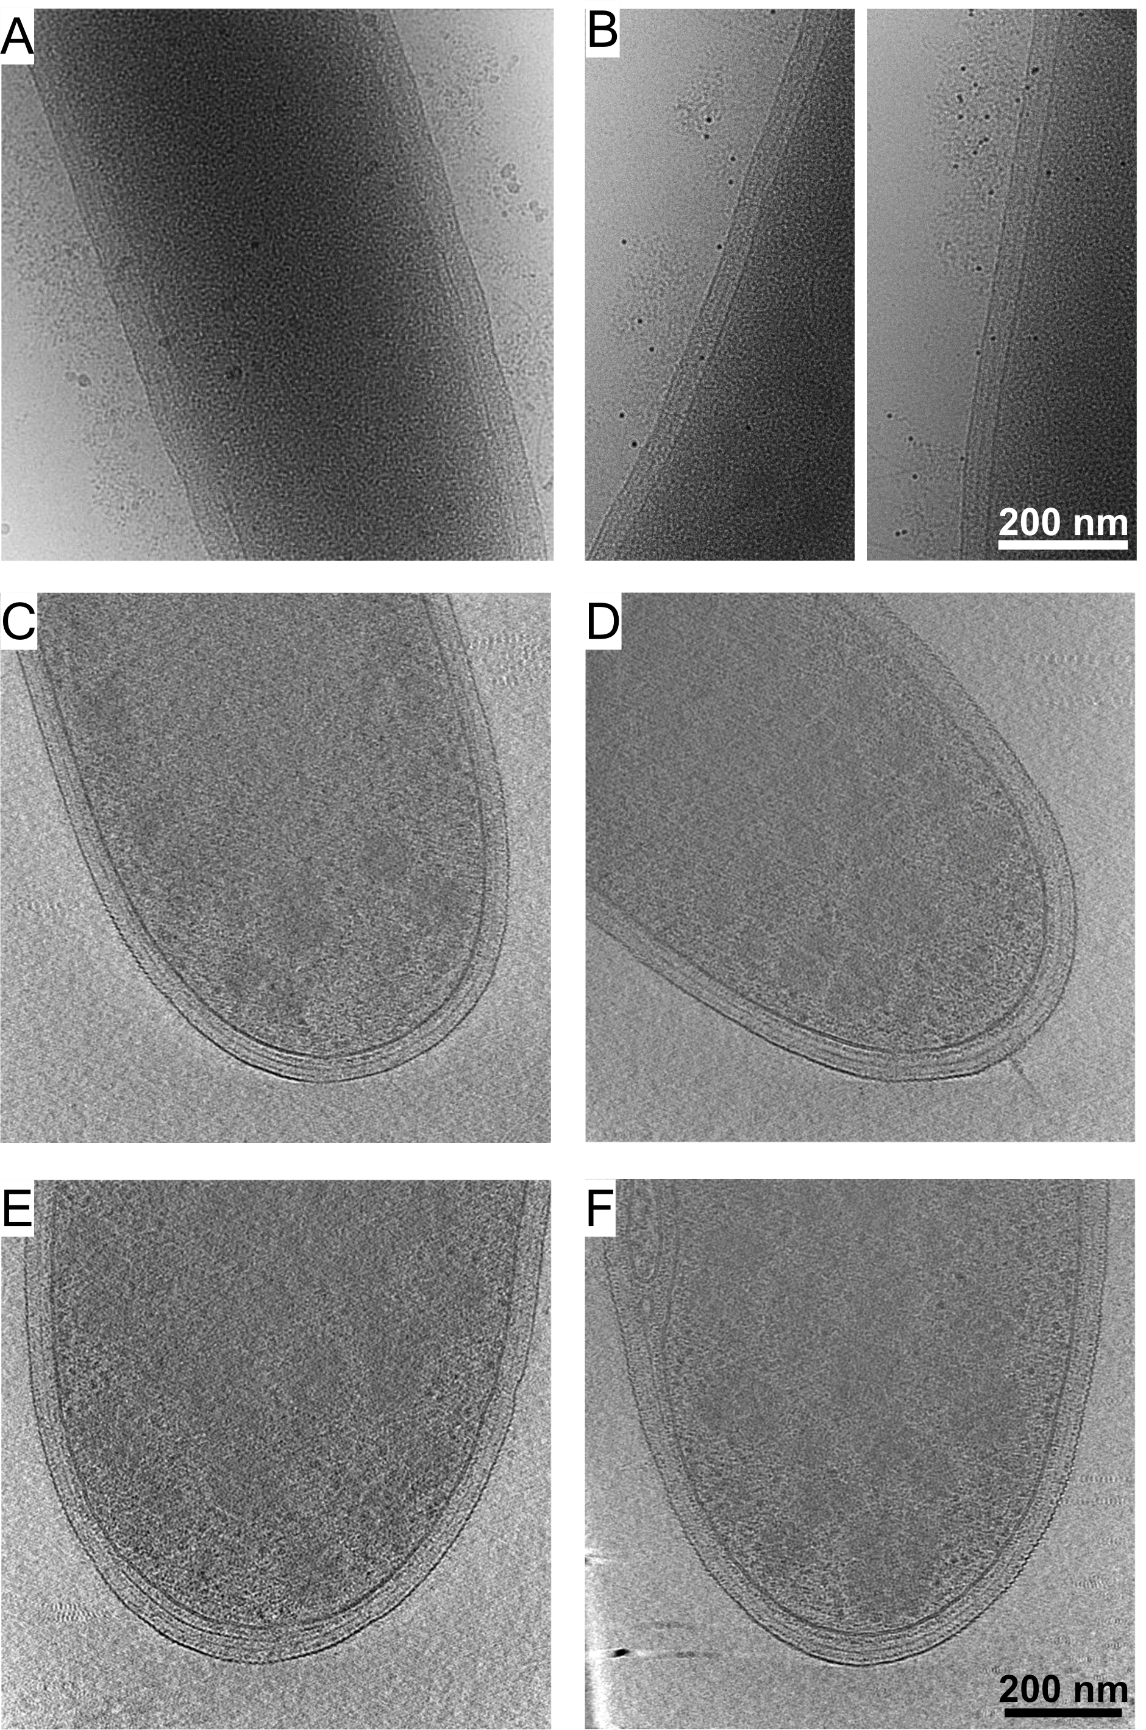


**Figure 1-figure supplement 2.** **Cellulosomal protein layers around *C. thermocellum* cells.** Immunogold labelling using protein A coupled with colloidal-gold alone showed no observed signals (A), while prior addition of the anti-CBM3a antibody directed the localization of the gold-conjugated protein A to the proteinaceous layer around the bacterium (B). Cryo-ET analysis of mutant strains: (C and D) Strain CTN7 expresses none of the major scaffoldins (i.e., CipA, OlpB, Orf2p, SdbA, OlpA and OlpC). (D and F) Strain DS11 lacks the major enzyme-integrating scaffoldin (CipA). Neither strain produces cellulosomal structures outside the cells. These experiments indicate that the observed exogenous layer corresponds to cellulosome-related proteins.
