# Supplementary material for: Nanoscale resolution of microbial fiber degradation in action
Source: eLife journal article supplement (doi:10.7554/elife.76523), 2022-05-31
Supplement: supp [file elife_poa_e76523_Figure_2_figure_supplement_3.docx]

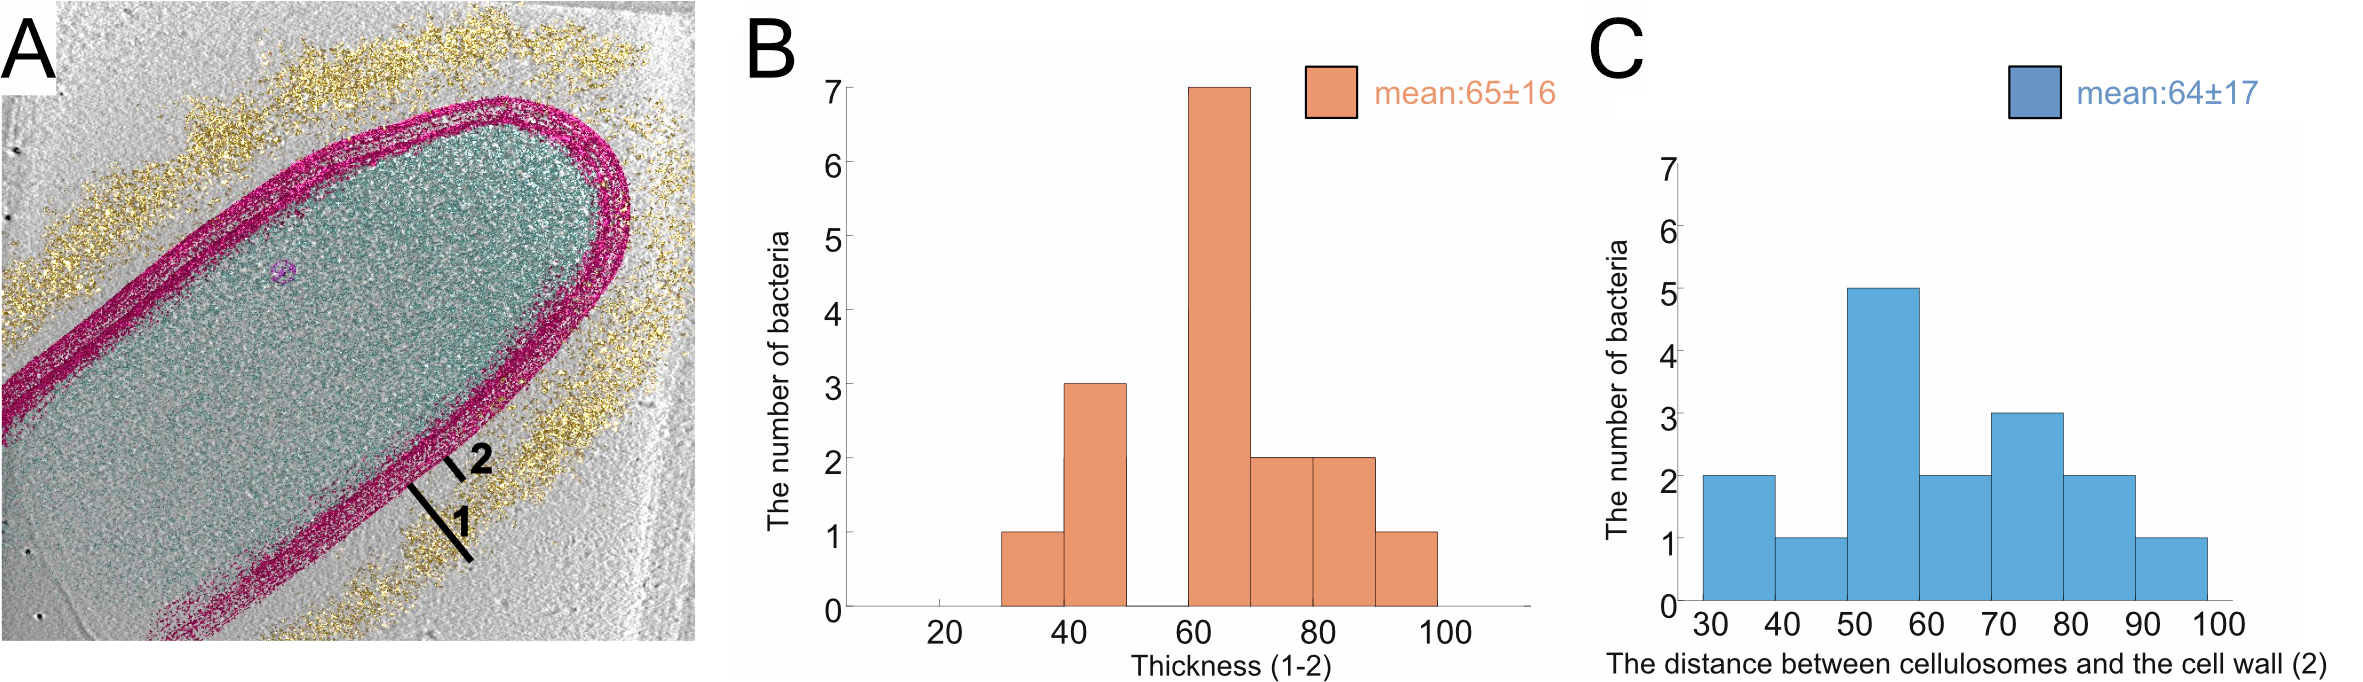


**Figure 2-figure supplement 3. Position and thickness of the cellulosome layer.** The thickness of the high density cellulosome layer (A:1-2) and the distance between the S-layer and cellulosomes (B:2) were measured around the bacteria (B, C, respectively, see Materials and Methods Section). Analysis of 16 tomograms was used for the histograms (B-C).
