# Supplementary material for: Nanoscale resolution of microbial fiber degradation in action
Source: eLife journal article supplement (doi:10.7554/elife.76523), 2022-05-31
Supplement: supp [file elife_poa_e76523_Figure_2_figure_supplement_4.docx]

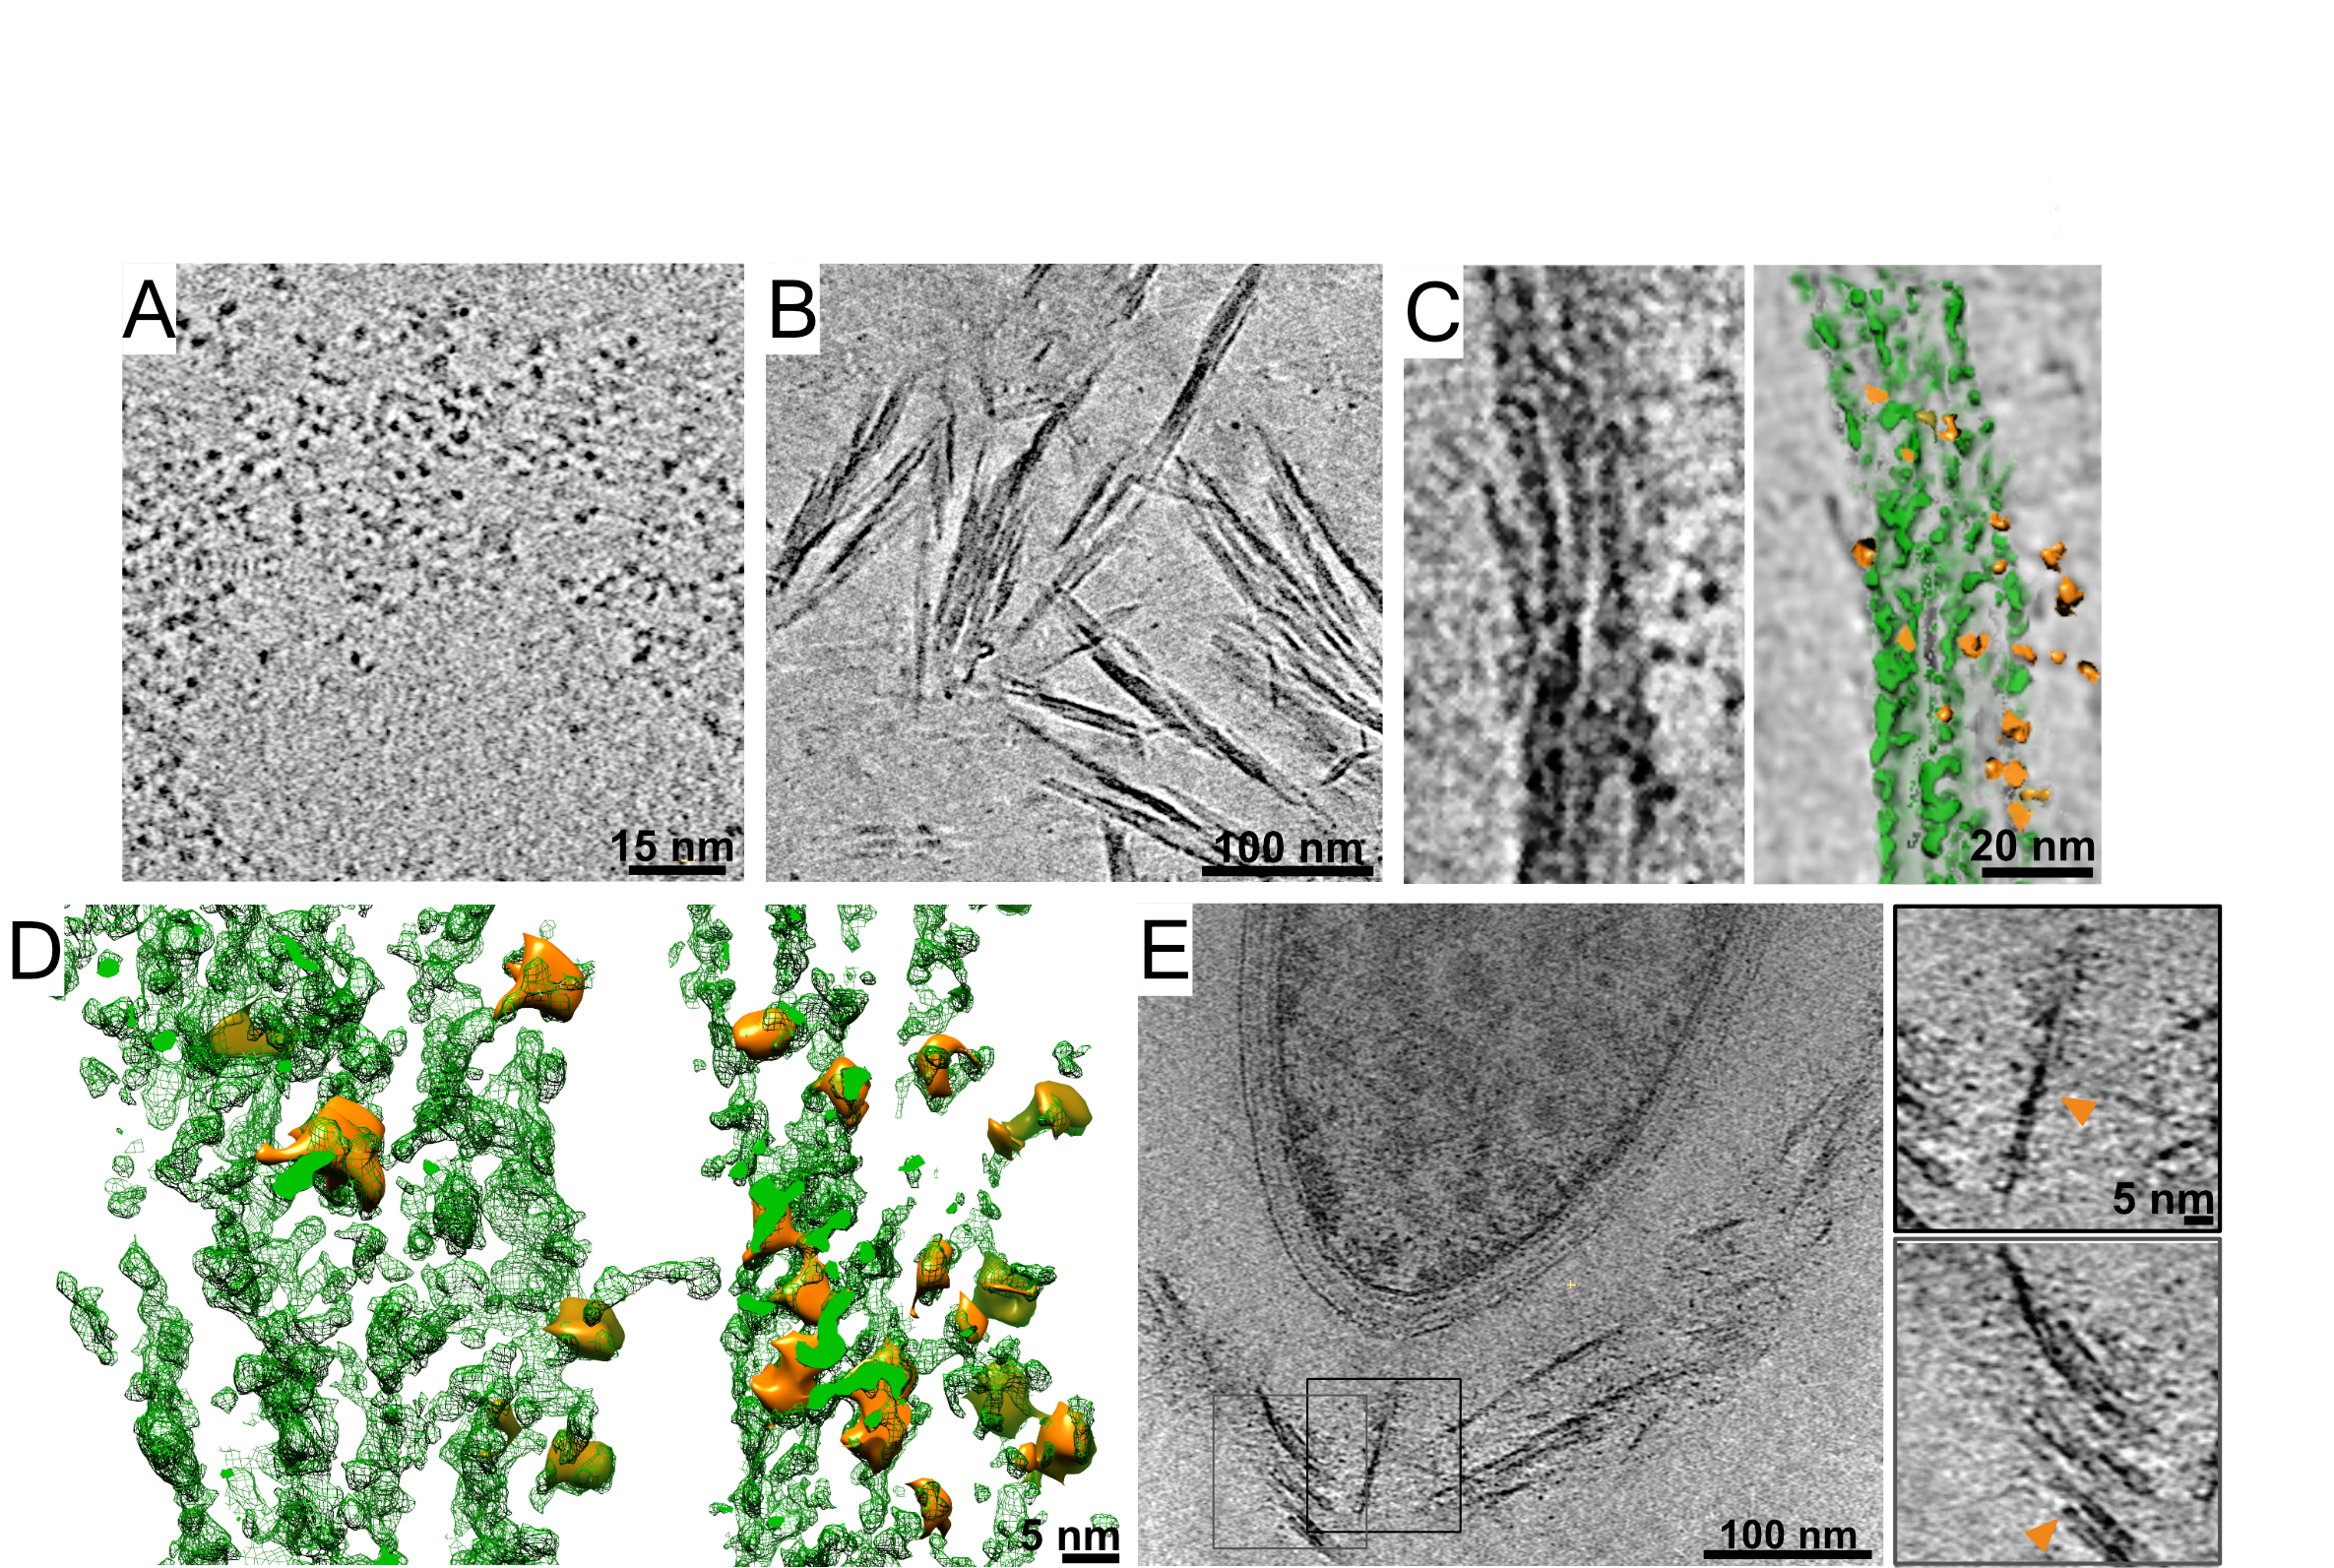


**Figure 2-figure supplement 4. Representative cryo-ET projection slices of MCC-cellulosome interactions.** (A) A close-up projection of the *in situ* cellulosome layer of a tomogram depicts globular enzymes. (B) Due to the crystalline nature of MCC, straight cellulose fibrils in solution were running parallel to each other. (C) Purified recombinant cellulosome complexes, similar to the globular enzymatic densities *in situ* (A), interact with crystalline cellulose. A colored rendering depicts enzymes in orange and MCC in green. Enzymes appear in the outer surface of MCC as well as in between fibers. (D) Close-up rendered views are shown of interactions between MCC (green) and Cel48S in complex with the divalent truncated scaffoldin (orange). (E) A projection slice of a bacterium grown for 15 h provides a view of the MCC-cellulosome interaction *in situ.* Orange arrows point to globular cellulosomal enzymes sitting on a crystalline array which is remarkably similar to MCC with Cel48S in complex with the truncated scaffoldin *in vitro* (C).
