# Supplementary material for: Nanoscale resolution of microbial fiber degradation in action
Source: eLife journal article supplement (doi:10.7554/elife.76523), 2022-05-31
Supplement: supp [file elife_poa_e76523_Figure_3_figure_supplement_2.docx]

**
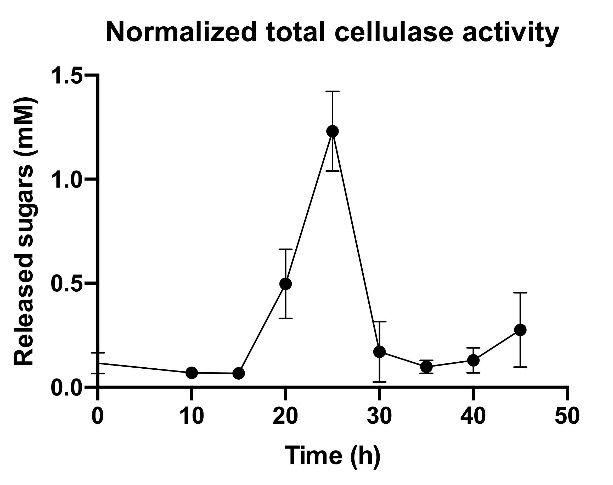
**

**Figure 3-figure supplement 2. Overall enzymatic activity of the cellulosomal machinery during population growth**. A sharp increase in the total cellulase activity normalized by cell number is observed at the early stages of bacterial growth and is followed by a marked decrease at the end of the exponential phase.
